# Supplementary material for: Statin Therapy in Non-ischemic Cardiomyopathy: evidence from a Population Based Cohort and Mendelian Randomization Analysis
Source: Research Square preprint supplement (doi:10.21203/rs.3.rs-4270769/v1), 2024-04-22
Supplement: Supplementary file 1 [file 3bfa75f58e6e76d5b792303c.docx]

Supplemental Table S1. The 21 SNPs Associated With Atorvastatin use From a GWAS Involving UK Biobank Participants That Were Available in the FinnGen GWAS and Included in the Statin-NICM MR Analyses.

| SNP | Chr | Position | Effect allele | Other allele | EAF | beta | se | P value |
| --- | --- | --- | --- | --- | --- | --- | --- | --- |
| rs10455872 | 6 | 161010118 | G | A | 0.078896 | 0.00873983 | 0.000655603 | 1.50E-40 |
| rs10738606 | 9 | 22088090 | T | A | 0.488832 | 0.00249535 | 0.000353232 | 1.60E-12 |
| rs1169288 | 12 | 121416650 | C | A | 0.316338 | 0.00250052 | 0.000382077 | 6.00E-11 |
| rs117113213 | 20 | 39165692 | A | G | 0.032671 | 0.00608886 | 0.00100561 | 1.40E-09 |
| rs12260037 | 10 | 114791490 | T | C | 0.282988 | 0.00217456 | 0.000392109 | 2.90E-08 |
| rs12748266 | 1 | 55494017 | C | T | 0.208713 | -0.00273878 | 0.000436208 | 3.40E-10 |
| rs13022873 | 2 | 27815510 | C | A | 0.256896 | 0.00277076 | 0.000404878 | 7.70E-12 |
| rs17411168 | 8 | 19855600 | C | T | 0.265617 | -0.0024753 | 0.000400203 | 6.20E-10 |
| rs2569550 | 19 | 11228745 | C | T | 0.592859 | 0.00255037 | 0.000360519 | 1.50E-12 |
| rs28601761 | 8 | 126500031 | G | C | 0.418699 | -0.00389684 | 0.000362357 | 5.70E-27 |
| rs2927472 | 19 | 45349369 | C | T | 0.836693 | 0.00342869 | 0.000481073 | 1.00E-12 |
| rs34468875 | 2 | 21383353 | T | C | 0.438013 | 0.00318151 | 0.000356593 | 4.60E-19 |
| rs429358 | 19 | 45411941 | C | T | 0.154145 | 0.0071186 | 0.000489615 | 6.80E-48 |
| rs4299376 | 2 | 44072576 | T | G | 0.676763 | -0.00318007 | 0.000377978 | 4.00E-17 |
| rs4915853 | 1 | 63191577 | A | C | 0.594079 | 0.00214608 | 0.000359947 | 2.50E-09 |
| rs56130071 | 7 | 21598753 | C | G | 0.216982 | 0.00242332 | 0.000430096 | 1.80E-08 |
| rs58542926 | 19 | 19379549 | T | C | 0.074649 | -0.00398551 | 0.000672915 | 3.20E-09 |
| rs6093446 | 20 | 39780932 | A | G | 0.287861 | 0.00224278 | 0.000390397 | 9.20E-09 |
| rs61194703 | 19 | 11192193 | T | A | 0.119069 | -0.00667266 | 0.000546065 | 2.40E-34 |
| rs629301 | 1 | 109818306 | T | G | 0.777941 | 0.00576275 | 0.000424926 | 6.70E-42 |
| rs964184 | 11 | 116648917 | C | G | 0.866372 | -0.00605927 | 0.000519301 | 1.90E-31 |

Abbreviations: Chr, chromosome; EAF, effect allele frequency in the atorvastatin genome-wide association study population; SNP, single-nucleotide polymorphism; NICM, non-ischemic cardiomyopathy; rs, reference single-nucleotide polymorphism;.

Beta: statin use or not per copy of the effect allele.

Supplemental Table S2. The 6 SNPs Associated With Rosuvastatin use From a GWAS Involving UK Biobank Participants That Were Available in the FinnGen GWAS and Included in the Statin-NICM MR Analyses.

| SNP | Chr | Position | Effect allele | Other allele | EAF | beta | se | P value |
| --- | --- | --- | --- | --- | --- | --- | --- | --- |
| rs12740374 | 1 | 109817590 | T | G | 0.221164 | -0.00128416 | 0.000196453 | 6.30E-11 |
| rs17248783 | 19 | 11210314 | A | G | 0.125719 | -0.00155286 | 0.000247471 | 3.50E-10 |
| rs2954038 | 8 | 126507389 | A | C | 0.697575 | -0.00117347 | 0.00017763 | 3.90E-11 |
| rs4420638 | 19 | 45422946 | G | A | 0.188871 | 0.00185022 | 0.000208391 | 6.80E-19 |
| rs4665492 | 2 | 21294039 | C | A | 0.347649 | 0.00120432 | 0.000171905 | 2.50E-12 |
| rs964184 | 11 | 116648917 | C | G | 0.866372 | -0.00176241 | 0.000239737 | 2.00E-13 |

Abbreviations: Chr, chromosome; EAF, effect allele frequency in the rosuvastatin genome-wide association study population; SNP, single-nucleotide polymorphism; NICM, non-ischemic cardiomyopathy; rs, reference single-nucleotide polymorphism;.

Beta: statin use or not per copy of the effect allele.

Supplemental Table S3. The 34 SNPs Associated With Simvastatin use From a GWAS Involving UK Biobank Participants That Were Available in the FinnGen GWAS and Included in the Statin-NICM MR Analyses.

| SNP | Chr | Position | Effect allele | Other allele | EAF | beta | se | P value |
| --- | --- | --- | --- | --- | --- | --- | --- | --- |
| rs1081105 | 19 | 45412955 | C | A | 0.027676 | 0.0134163 | 0.00199809 | 1.90E-11 |
| rs10857147 | 4 | 81181072 | T | A | 0.289996 | 0.00447243 | 0.000723471 | 6.30E-10 |
| rs112552009 | 19 | 11193091 | G | T | 0.11842 | -0.0151591 | 0.0010128 | 1.20E-50 |
| rs11570891 | 8 | 19822810 | T | C | 0.106653 | -0.00648241 | 0.00105992 | 9.60E-10 |
| rs11591147 | 1 | 55505647 | T | G | 0.017452 | -0.0297996 | 0.00249708 | 7.90E-33 |
| rs11601507 | 11 | 5701074 | A | C | 0.069473 | 0.007686 | 0.00127059 | 1.50E-09 |
| rs117733303 | 6 | 160922870 | G | A | 0.01841 | 0.0160565 | 0.00243107 | 4.00E-11 |
| rs1260326 | 2 | 27730940 | C | T | 0.604288 | -0.00391959 | 0.000668235 | 4.50E-09 |
| rs12740374 | 1 | 109817590 | T | G | 0.221164 | -0.0118904 | 0.000787483 | 1.60E-51 |
| rs13167071 | 5 | 156373637 | C | G | 0.638339 | 0.00389746 | 0.000682569 | 1.10E-08 |
| rs1367117 | 2 | 21263900 | A | G | 0.335113 | 0.00810706 | 0.000692137 | 1.10E-31 |
| rs1831733 | 9 | 22076795 | C | T | 0.478276 | 0.00507061 | 0.000657246 | 1.20E-14 |
| rs2207132 | 20 | 39142516 | A | G | 0.033352 | 0.0131506 | 0.0018204 | 5.00E-13 |
| rs2618567 | 20 | 17844492 | T | G | 0.65858 | -0.00407181 | 0.000690085 | 3.60E-09 |
| rs2673134 | 2 | 227145757 | G | A | 0.63627 | 0.00425207 | 0.000679671 | 3.90E-10 |
| rs2737231 | 8 | 116650219 | G | A | 0.303083 | -0.00394217 | 0.00071389 | 3.30E-08 |
| rs2738447 | 19 | 11227480 | C | A | 0.592532 | 0.00543093 | 0.000666509 | 3.70E-16 |
| rs2980888 | 8 | 126507308 | C | T | 0.697764 | -0.0078266 | 0.000712484 | 4.50E-28 |
| rs3127580 | 6 | 160710851 | T | C | 0.155281 | 0.00530494 | 0.000902532 | 4.20E-09 |
| rs34042070 | 16 | 72101525 | G | C | 0.188005 | 0.00541634 | 0.000840626 | 1.20E-10 |
| rs35198068 | 10 | 114754784 | C | T | 0.291486 | 0.00583448 | 0.000720071 | 5.40E-16 |
| rs4299376 | 2 | 44072576 | T | G | 0.676763 | -0.00679804 | 0.000699458 | 2.50E-22 |
| rs4360309 | 8 | 126523523 | T | C | 0.486544 | 0.003777 | 0.000666246 | 1.40E-08 |
| rs57180587 | 8 | 18269581 | T | A | 0.144965 | 0.0069055 | 0.000927663 | 9.80E-14 |
| rs58542926 | 19 | 19379549 | T | C | 0.074649 | -0.00835893 | 0.00124536 | 1.90E-11 |
| rs645040 | 3 | 135926622 | T | G | 0.773061 | 0.00465077 | 0.000780483 | 2.50E-09 |
| rs7412 | 19 | 45412079 | T | C | 0.080152 | -0.0257363 | 0.00120546 | 3.90E-101 |
| rs74617384 | 6 | 160997118 | T | A | 0.078767 | 0.0111719 | 0.00121417 | 3.50E-20 |
| rs7513688 | 1 | 6652745 | A | G | 0.359985 | 0.00382049 | 0.000684108 | 2.30E-08 |
| rs76895963 | 12 | 4384844 | G | T | 0.020691 | -0.0144249 | 0.00253424 | 1.30E-08 |
| rs79598313 | 1 | 27284913 | T | C | 0.02337 | 0.0124851 | 0.00216735 | 8.40E-09 |
| rs8126001 | 20 | 62712053 | T | C | 0.489521 | -0.00362569 | 0.000656597 | 3.40E-08 |
| rs9368222 | 6 | 20686996 | A | C | 0.26245 | 0.00456035 | 0.000743334 | 8.50E-10 |
| rs964184 | 11 | 116648917 | C | G | 0.866372 | -0.0110507 | 0.000961124 | 1.40E-30 |

Abbreviations: Chr, chromosome; EAF, effect allele frequency in the simvastatin genome-wide association study population; SNP, single-nucleotide polymorphism; NICM, non-ischemic cardiomyopathy; rs, reference single-nucleotide polymorphism;.

Beta: statin use or not per copy of the effect allele.

Figure S1. Funnel plots showing the inverse variance weighted MR estimate of each statins SNP with NICM (1/SEiv). A. Atorvastatin. B. Rosuvastatin. C. Simvastatin.
